# Supplementary material
Source: Springer Nature journal article supplement (https://www.springermedizin.de/resource/supplementary/12985_2009_750_MOESM3_ESM.pdf/9609206)

MAA

SNA

kidney

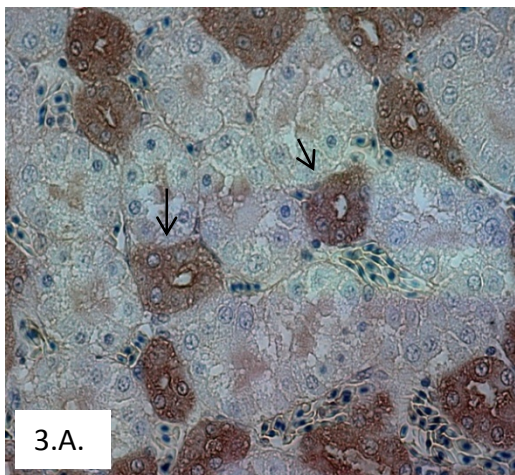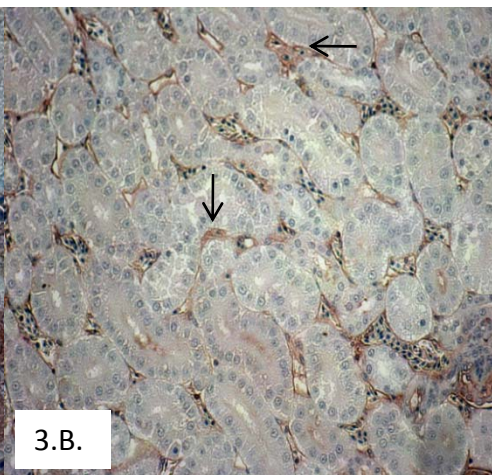

esophagus

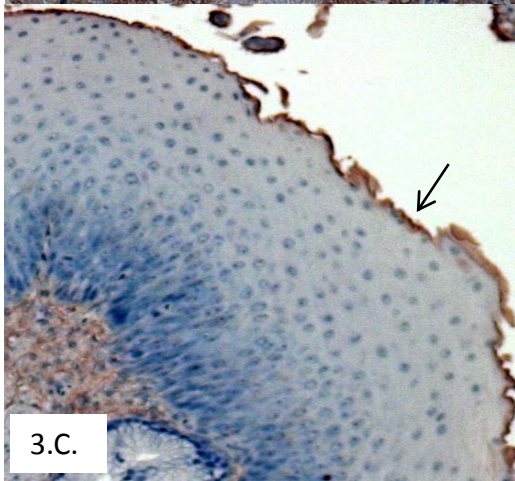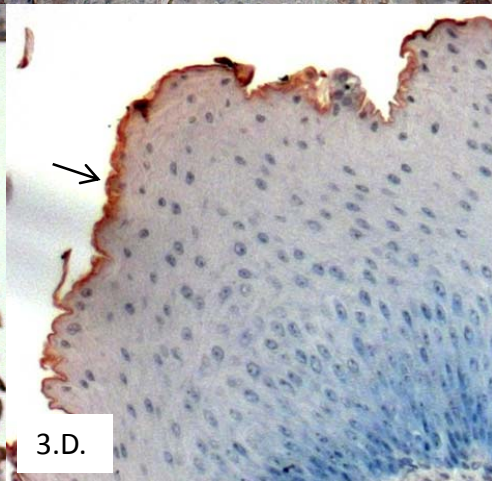

bursa

brain

cecal tonsil

MAA

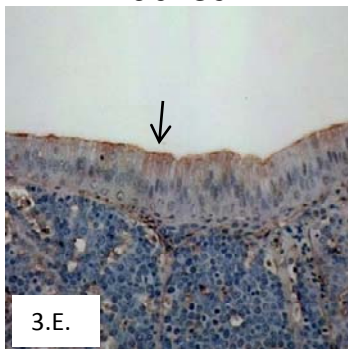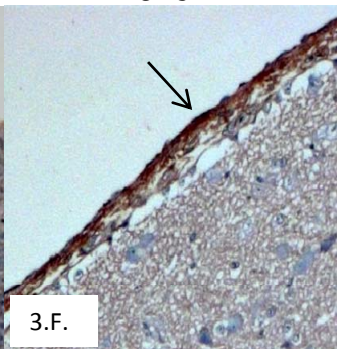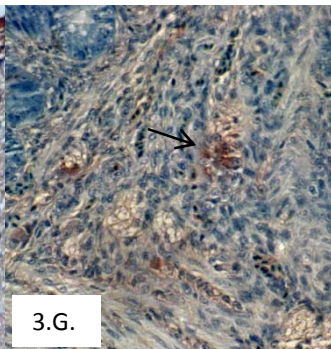

Supplement: MOESM3 [file 9609206]
